# Supplementary material
Source: PubMed Central journal article supplement (PMC6718441)
Supplement: 10.1194_M092460_jlr.M092460-1.pdf [file 10.1194_M092460_jlr.M092460-1.pdf]

**SUPPLEMENTARY INFORMATION:**

**Intestinal basolateral lipid substrate transport (BLST) is linked to chylomicron secretion and is regulated by apoC-III.**

Diana Li<sup>1</sup>, Cayla N. Rodia<sup>1</sup>, Zania K. Johnson<sup>1</sup>, Minkyung Bae<sup>1</sup>, Angelika Muter<sup>1</sup>, Amy E. Heussinger<sup>1</sup>, Nicholas Tambini<sup>1</sup>, Austin M. Longo<sup>1</sup>, Hongli Dong<sup>1</sup>, Ji-Young Lee<sup>1</sup>, Alison B. Kohan<sup>1\*</sup>.

\*To whom correspondence should be addressed [alison.kohan@uconn.edu](mailto:alison.kohan@uconn.edu).

<sup>1</sup>Department of Nutritional Sciences, University of Connecticut, Storrs, CT

Supplementary Figure S1. *ApoC-III<sup>Tg</sup>* mouse phenotyping.

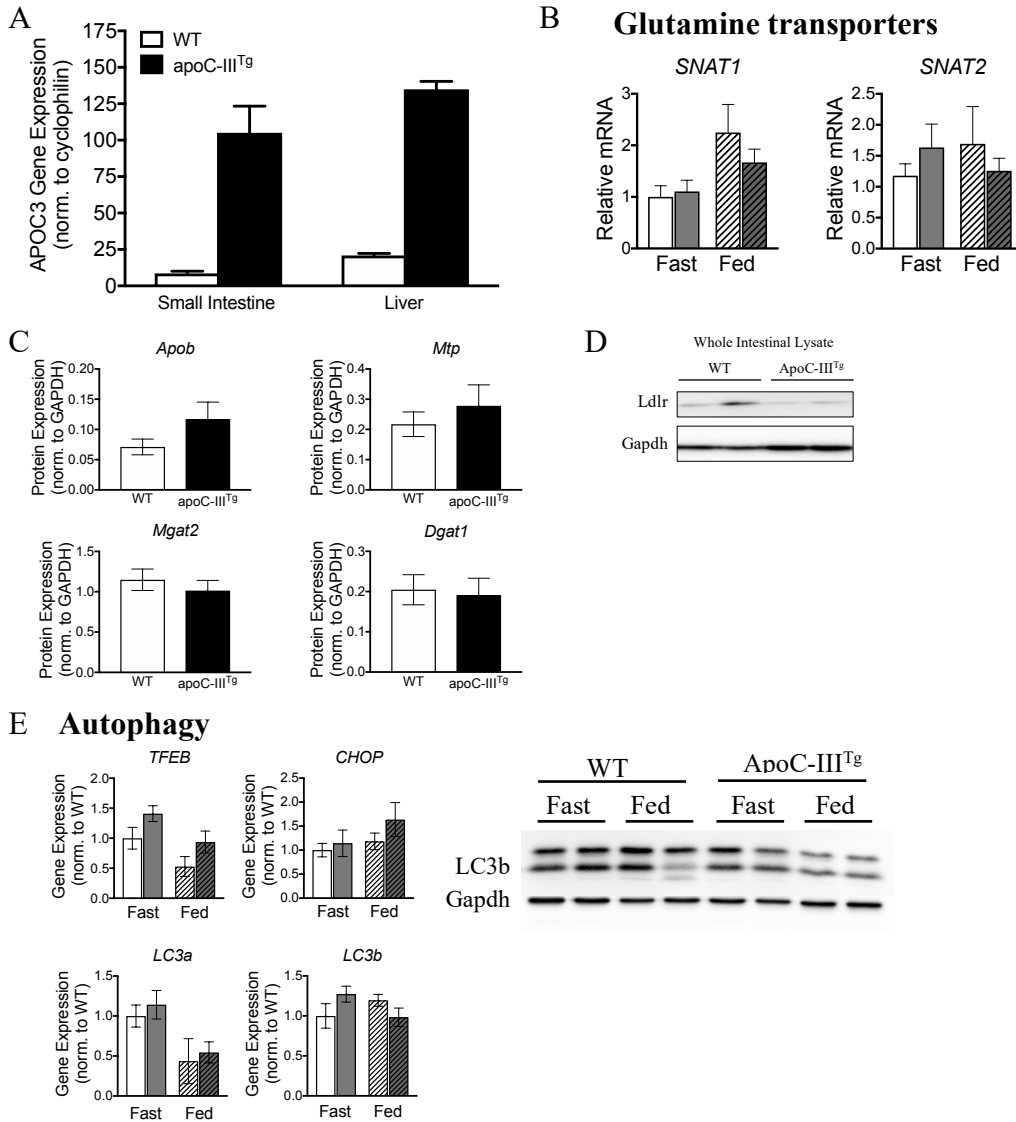

Supplementary Figure S1. *ApoC-III<sup>Tg</sup>* mouse phenotyping. (A) Mouse apoC-III mRNA expression in *WT* mice (white bars) and human apoC-III mRNA expression in *apoC-III<sup>Tg</sup>* mice (black bars) in small intestine and liver. (B) Gene expression of glutamine and lipid transporters in intestine of *WT* and *apoC-III<sup>Tg</sup>* mice in fasted and fed conditions (n=3-6 mice per genotype). (C) Densitometric analysis of Western Blot from Figure 1F (n=6 mice per genotype). (D) Protein expression of LDLR in *WT* and *apoC-III<sup>Tg</sup>* intestine shown by representative Western blot (n=3 mice per genotype, n=2 shown). (E) Gene expression of autophagy genes in intestine of *WT* and *apoC-III<sup>Tg</sup>* mice in fasted and fed conditions (n=3-6 mice per

genotype). Protein expression of LC3I and LC3II shown by Western blot (n=4 mice per genotype). Data shown are mean  $\pm$  SEM. \*  $p < 0.05$ , \*\*  $p < 0.01$ , \*\*\*  $p < 0.001$ , compared with the control mouse (two tailed Student's  $t$  test).

Supplementary Figure S2. Flow Cytometric Gating Strategy

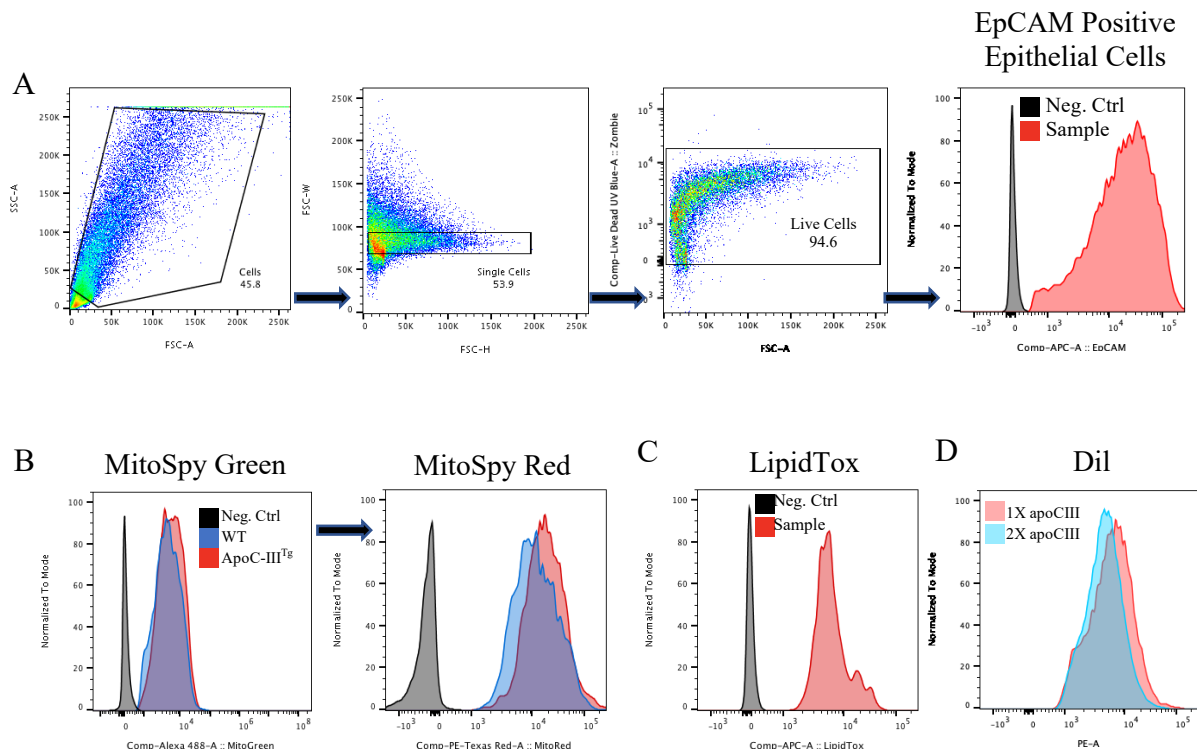

Supplementary Figure S2. ***Flow Cytometric Gating Strategy.*** (A) Complete gating strategy for identification of intestinal EpCAM positive epithelial cells. Cells are first gated by size and granularity using FSC-A x SSC-A followed by identification of singlets using FSC-H x FSC-W. Live cells were determined using a Live/Dead discriminate dye. Epithelial cells were defined as EpCAM positive cells. Representative histograms are shown for the following: (B) EpCAM positive epithelial cells were then further gated on MitoSpy Green FM to determine mitochondrial mass. Cells positive for MitoSpy Green (EpCAM<sup>+</sup>) were used to identify cells with MitoSpy Red CMXRos. (C) EpCAM positive epithelial cells were further gated on HCS LipidTox Deep Red to identify intracellular neutral lipid. (D) Dil positive cells were gated on PE to identify mean fluorescence intensity after dil-VLDL treatment. All populations were gated using fluorescence minus one control (black peaks in histograms), except for identification of size and granularity and singlets.

Supplementary Figure S3. TEM images of Fasted Enterocytes

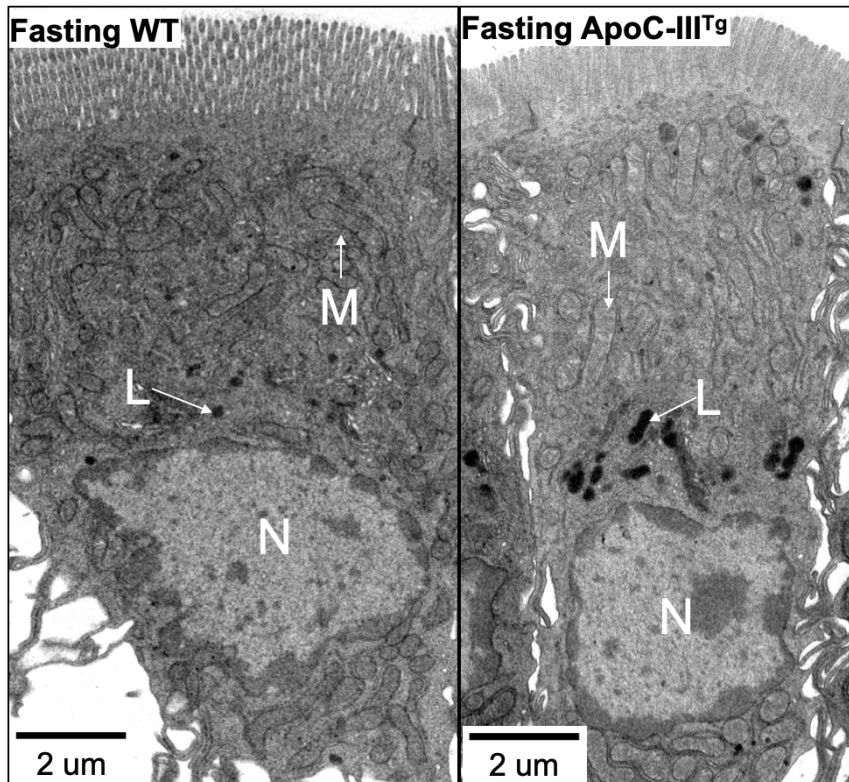

Supplementary Figure S3. **TEM images of fasted enterocytes.** TEM micrographs of jejunum enterocytes collected from *WT* and *apoC-III<sup>Tg</sup>* mice after a 12 hour fast. Labels: Cytosolic lipid droplets (C), Nucleus (N), Mitochondria (M), Interstitial space (I), Vesicles containing lipid (V) (66, 67). n=3 biological replicates were analyzed by TEM (and at least 6 different enterocytes along the same crypt villus axis of each experimental animal was analyzed).

Supplementary Table S1. ***List of antibodies and stains used for Western Blot and flow cytometry.***

Western blot antibodies dilutions included in the table. Flow cytometry antibodies and stains used at recommended concentrations as per manufacturer's instructions.

| <b>Western Blot Antibodies</b>                            | <b>Company</b> | <b>Catalog Number</b> |
|-----------------------------------------------------------|----------------|-----------------------|
| Rabbit anti-mouse ApoB, 1:500                             | Abcam          | 20737                 |
| Rabbit anti-mouse MTTP, 1:500                             | Abcam          | 86759                 |
| Rabbit anti-mouse MGAT2, 1:200                            | Santa Cruz     | 66963                 |
| Goat anti-mouse DGAT1, 1:250                              | Abcam          | 177236                |
| Rabbit anti-mouse/human apoC3, 1:250                      | Abcam          | 55984                 |
| Goat anti-human apoC3, 1:500                              | Academy        | 33A-G2b               |
| Rabbit anti-mouse/human GAPDH, 1:10,000                   | Abcam          | 181602                |
| Rabbit anti-mouse LC3B, 1:2000                            | Abcam          | 48394                 |
| Rabbit anti-mouse LDLR 1:200                              | Abcam          | 30532                 |
| Gizzard anti-mouse beta-actin conjugated to HRP, 1:10,000 | Santa Cruz     | 47778                 |

| <b>Flow Cytometry Antibodies and Stains</b> | <b>Company</b>   | <b>Catalog Number</b> |
|---------------------------------------------|------------------|-----------------------|
| MitoSpy Red CMXRos                          | Biologend        | 424802                |
| MtioSpy Green FM                            | Biologend        | 424805                |
| Zombie UV                                   | Biologend        | 423107                |
| APC anti-mouse CD326                        | Biologend        | 118213                |
| HCS LipidTox Deep Red                       | Invitrogen       | H34477                |
| Dil-VLDL                                    | Kalen Biomedical | 7701309               |

Supplementary Table S2. *List of primers used to measure mRNA expression.*

| Gene  | Name                                                                 | Species | Forward 5'-3'              | Reverse 5'-3'           |
|-------|----------------------------------------------------------------------|---------|----------------------------|-------------------------|
| ACOX1 | Acyl-CoA oxidase 1                                                   | Mouse   | CAGGAAGAGCAAGGAAGTGG       | CCTTCTGGCTGATCCATA      |
| ACSL5 | Acyl-CoA synthetase long chain                                       | Mouse   | GACACCGACACTGAAAGCCA       | CCTCGGAGCCCTCATCAGTAA   |
| APOB  | Apolipoprotein B                                                     | Mouse   | GCCCATTGTGGACAAGTTGATC     | CCAGGACTTGGAGGTCTTGGGA  |
| APOC3 | Apolipoprotein C3                                                    | Mouse   | GCATCTGCCCGAGCTGAAGAG      | CTGAAGTGATTGTCCATCCAGC  |
| APOC3 | Apolipoprotein C3                                                    | Human   | GACCGATGGCTTCAGTTCC        | GCAGGATGGATAGGCAGGT     |
| CD36  | Cluster of differentiation 36                                        | Mouse   | TTGTACTATACTGTGGCTAAATGAGA | CTTGTGTTTTGAACATTCTGCTT |
| CPT1A | Carnitine Palmitoyltransferase 1 alpha                               | Mouse   | CTCAGTGGGAGCGACTCTTCA      | GGCCTCTGTGGTACACGACAA   |
| CPT1B | Carnitine Palmitoyltransferase 1 beta                                | Mouse   | CCCATGTGCTCCTACCAGAT       | CCTTGAAGAAGCGACCTTTG    |
| PPIA  | Cyclophilin                                                          | Mouse   | TGGAGAGCACCAAGACAGACA      | TGCCGGAGTCGACAATGAT     |
| DGAT1 | Diacylglyceride acyltransferase 1                                    | Mouse   | GCTCTGGCATCATACTACCATC     | CGGTAGGTCAGGTTGTCTGG    |
| HSL   | Hormone sensitive lipase                                             | Mouse   | GGCTCACAGTTACCATCTCACC     | GAGTACCTTGCTGTCTGTCC    |
| LC3A  | Microtubule-associated protein 1 light chain 3 alpha                 | Mouse   | TTGGTCAAGATCATCCGGC        | GCTCACCATGTGTGTCTGG     |
| LC3B  | Microtubule-associated protein 1 light chain 3 beta                  | Mouse   | CCCACCAAGATCCCAGTGAT       | CCAGGAACTTGGTCTTGTTCCA  |
| LDLR  | LDL receptor                                                         | Mouse   | TGACTCAGACGAACAAGGCTG      | ATCTAGGCAATCTCGGTCTCC   |
| LPL   | Lipoprotein lipase                                                   | Mouse   | ACTCGCTCTCAGATGCCCTA       | TTGTGTTGCTTGCCATCCT     |
| ACADM | Medium-chain acyl-CoA dehydrogenase                                  | Mouse   | TGACGGAGCAGCCAATGA         | ATGGCCGCCACATCAGA       |
| MGAT2 | Monoacylglycerol acyltransferase 2                                   | Mouse   | CAGAAGATCATGGGCATCTC       | CCAAAGCTGTACTGGAAGAC    |
| MTTP  | Microsomal triglyceride transfer protein                             | Mouse   | CAAGCTCACGTACTCCACTGAAG    | TCATCATCACCATCAGGATTCCT |
| PLIN2 | Perilipin 2                                                          | Mouse   | AGCTCAGTTATGGTCTTG         | TCCTCACAAGACTAACAC      |
| PLIN3 | Perilipin 3                                                          | Mouse   | CTGAGAAAGGCGTCAAGACC       | TTCTTGAGCCCCAGACACT     |
| PGC1A | Peroxisome proliferator-activated receptor gamma coactivator 1 alpha | Mouse   | AACCACACCCACAGGATCAGA      | TCTTCGTTTATTGCTCCATGA   |
| SNAT2 | Sodium coupled neutral amino acid transporter 2                      | Mouse   | GGTATCTGAACGGTGACTATCTG    | TCTGCGGTGCTATTGAATGC    |
| SNAT1 | Sodium coupled neutral amino acid transporter 1                      | Mouse   | TTACCAACCATCGCCTTC         | ATGAGAATGTCGCCTGTG      |
| TFEB  | Transcription factor EB                                              | Mouse   | GCGAGAGCTTAACAGATGCTGA     | CCGGTCATTGATGTTGAACC    |
| VLDLR | VLDL receptor                                                        | Mouse   | TCCAATGGCCTAATGGAATTACA    | AGCATGTGCAACTTGGAAATCC  |
